# Supplementary material for: Selective induction of apoptotic cell death in lung carcinoma cells by curcumin-loaded PEGylated lipid nanoparticles with minimal normal tissue toxicity: in vitro and in vivo toxicity evaluation by oral delivery
Source: Royal Society of Chemistry journal article supplement (doi:10.1039/d4ma00050a), 2024-01-01
Supplement: d4ma00050a1.pdf [file d4ma00050a1.pdf]

## Selective Induction of Apoptotic Cell Death in Lung Carcinoma Cells by Curcumin loaded PEGylated Lipid Nanoparticles with Minimal Normal Tissue Toxicity: *In-Vitro* & *In-Vivo* Toxicity Evaluation by Oral Delivery

Bijaideep Dutta<sup>a,b</sup>, Sourav Kumar Das<sup>b,c</sup>, Mayur Temgire<sup>d,e</sup>, Jayesh Bellare<sup>e</sup>, K. C. Barick<sup>a,b\*</sup>, Amit Kumar<sup>b,c</sup>, P. A. Hassan<sup>a,b\*</sup>

<sup>a</sup>Chemistry Division, Bhabha Atomic Research Centre, Trombay, Mumbai 400085, India

<sup>b</sup>Homi Bhabha National Institute, Anushaktinagar, Mumbai 400094, India

<sup>c</sup>Radiation Biology and Health Science Division, Bhabha Atomic Research Centre, Trombay, Mumbai 400085, India

<sup>d</sup>Advanced Centre for Treatment, Research and Education in Cancer (ACTREC), Navi Mumbai-410210, India

<sup>e</sup> Indian Institute of Technology, Bombay, Powai, Mumbai-400076, India

\*Corresponding author: Tel.: + 91 22 2559 0284, Fax: + 91 22 2550 5099,  
Email: kbarick@barc.gov.in (K. C. Barick), hassan@barc.gov.in (P. A. Hassan)

### Supplementary data

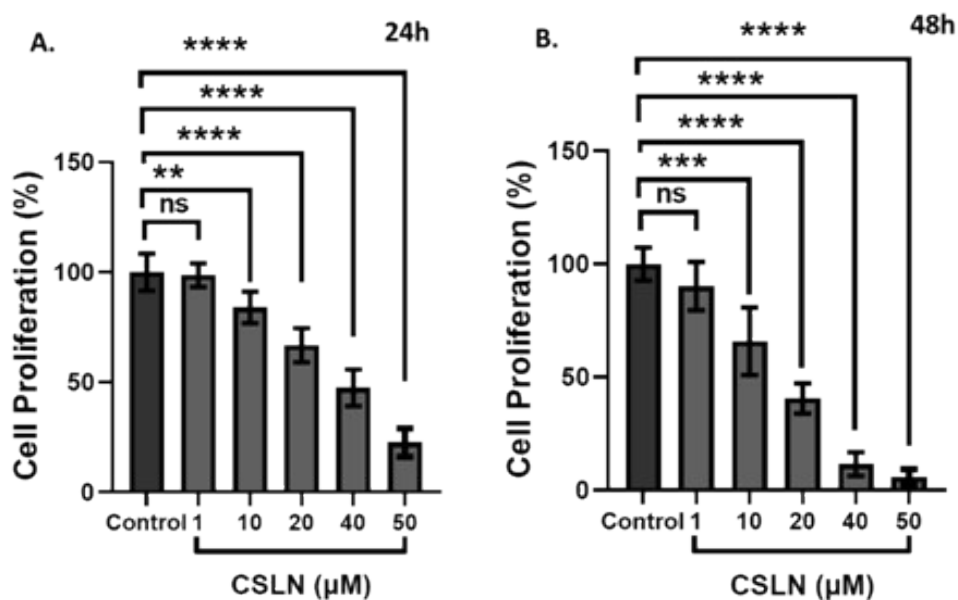

Fig. 1S: Percentage proliferation of A549 cells after 24h (A) or 48h (B) of treatment with CSLN (1-50 μM) as determined by MTT assay. The values are mean±SD for three independent experiments performed in triplicates. \*\*p<0.01, \*\*\*p<0.001, \*\*\*\*p<0.0001 compared to control group. ns: Not significant.
